# Supplementary material for: De-novo NAD+ synthesis regulates SIRT1-FOXO1 apoptotic pathway in response to NQO1 substrates in lung cancer cells
Source: PubMed Central journal article supplement (PMC5308742; doi:10.18632/oncotarget.11526), 2016-08-23
Supplement: oncotarget-07-62503-s001.pdf [file oncotarget-07-62503-s001.pdf]

## De-novo NAD<sup>+</sup> synthesis regulates SIRT1-FOXO1 apoptotic pathway in response to NQO1 substrates in lung cancer cells

### SUPPLEMENTARY FIGURES AND TABLES

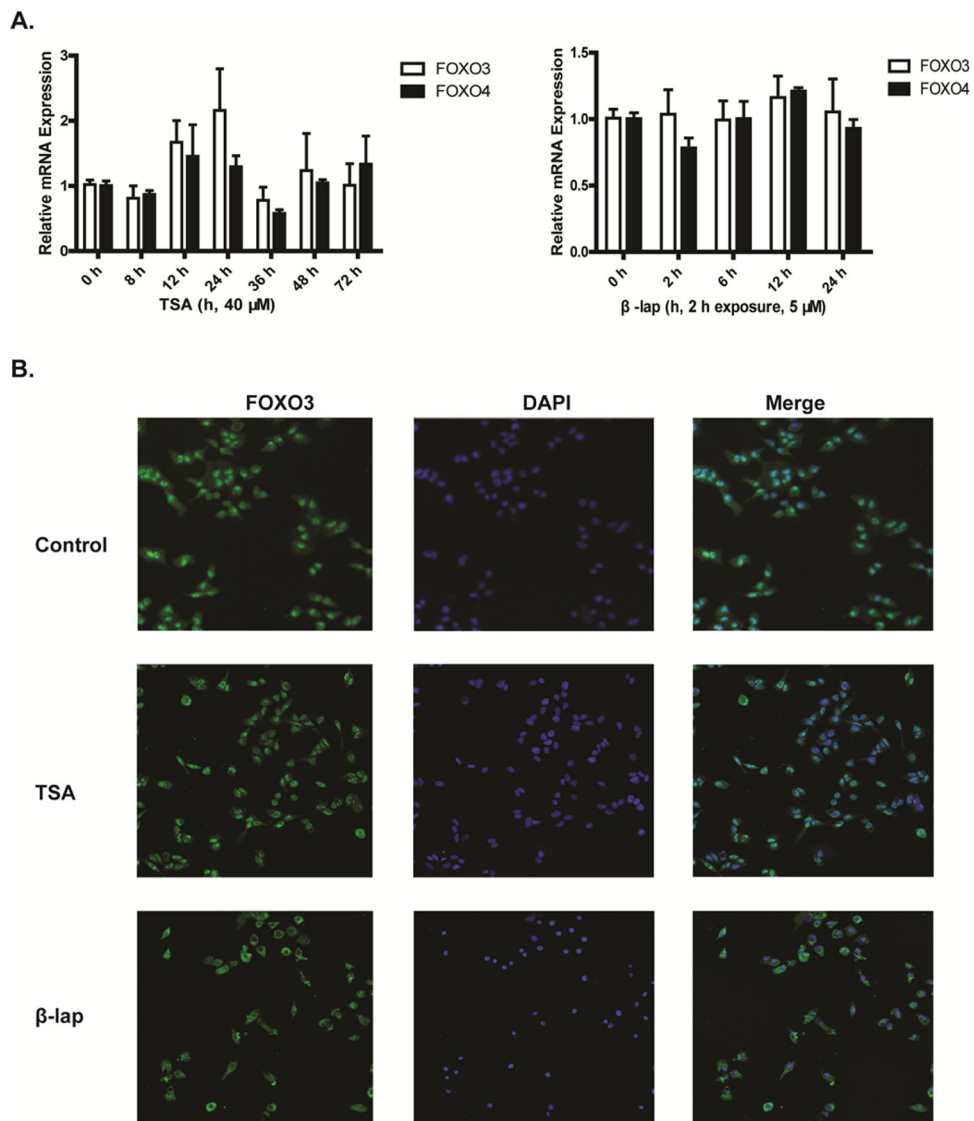

**Supplementary Figure S1: NQO1 substrates have no significant effect on FOXO3 and FOXO4 activation.** A. FOXO3 or FOXO4 mRNA levels. B. FOXO3 nuclear translocation.

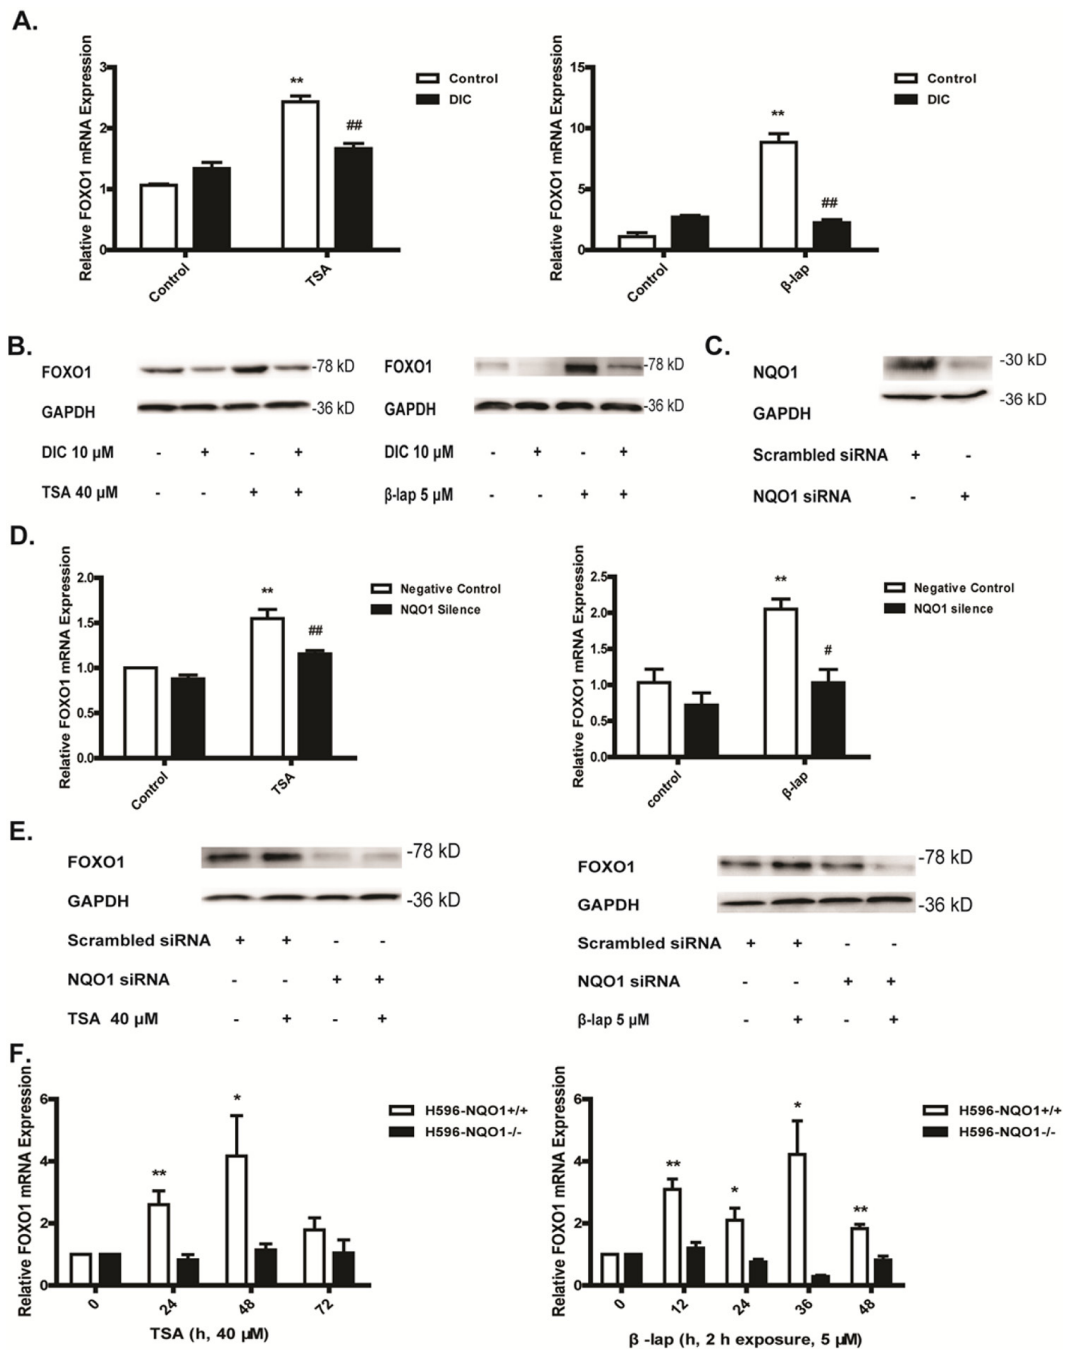

**Supplementary Figure S2: Activation of FOXO1 by TSA or  $\beta$ -lap is NQO1-dependent.** A. FOXO1 mRNA levels. B. FOXO1 protein levels. C. NQO1 silencing efficacy. D. FOXO1 mRNA levels. E. FOXO1 protein levels. F. FOXO1 mRNA levels in H596-NQO1<sup>+/+</sup> cells/H596-NQO1<sup>-/-</sup> cells. Data are shown as mean  $\pm$  SEM of three independent experiments, \* $P$ <0.05, \*\* $P$ <0.01 VS control; # $P$ <0.05, # $P$ <0.01, DIC or NQO1 siRNA pretreatment VS corresponding control, Student's  $t$  test.

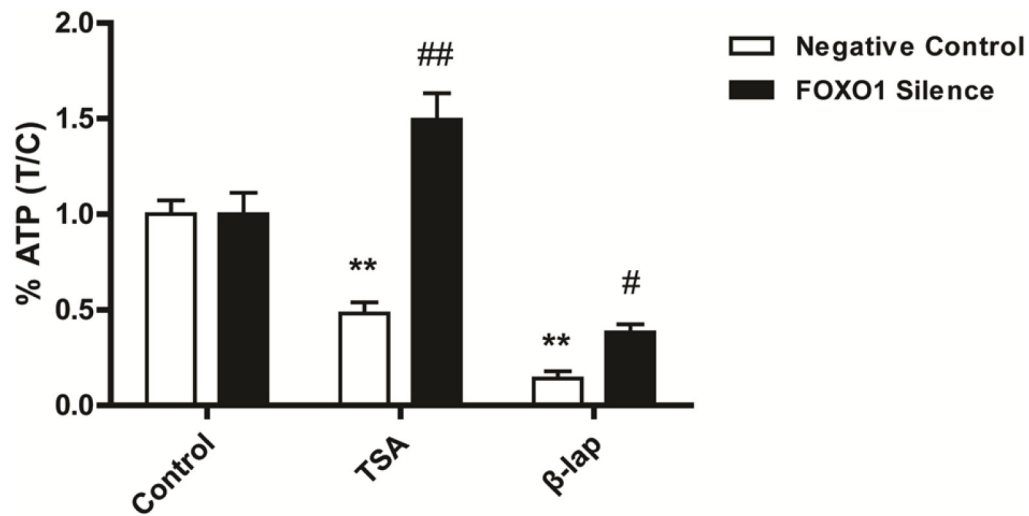

**Supplementary Figure S3: FOXO1 silencing reverses TSA and β-lap induced decrease of ATP.** The amount of ATP was determined with Molecular Probes' ATP Determination Kit and relative ATP % was calculated with untreated cells as negative control. Data are shown as mean ± SEM of three independent experiments, \*P<0.05, \*\*P<0.01 VS control; #P<0.05, ##P<0.01, DIC or NQO1 siRNA pretreatment VS corresponding control, Student's *t* test.

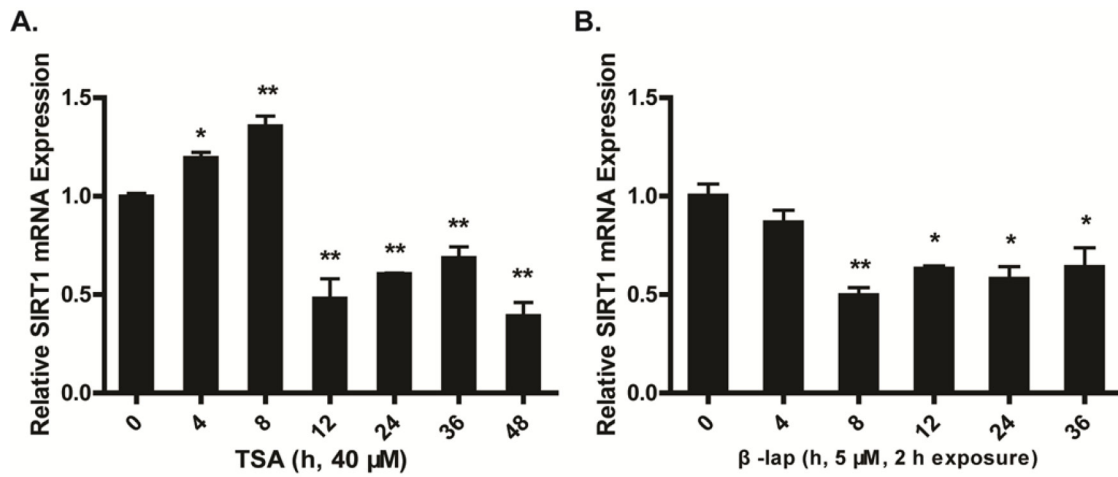

**Supplementary Figure S4: NQO1 substrates reduce SIRT1 mRNA level.** **A.** SIRT1 mRNA level during time course of TSA exposure. **B.** SIRT1 mRNA level during time course of  $\beta$ -lap exposure. Data are shown as mean  $\pm$  SEM of three independent experiments, \* $P$ <0.05, \*\* $P$ <0.01 VS control, Student's *t* test.

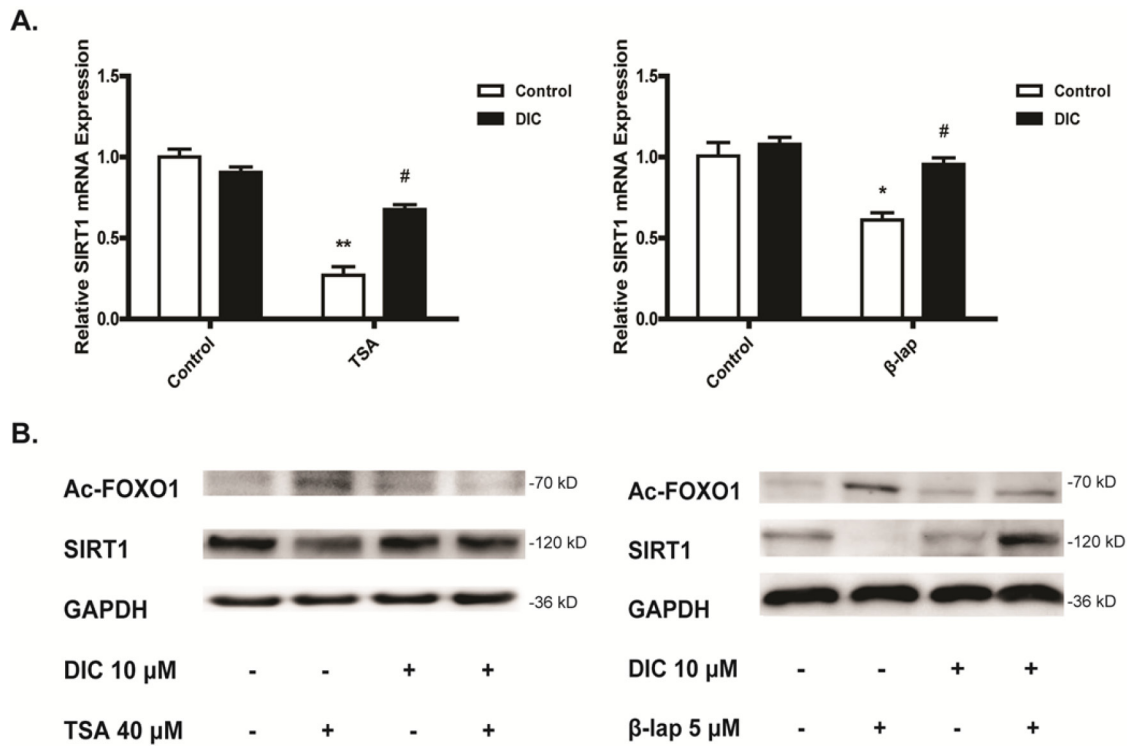

**Supplementary Figure S5: TSA or  $\beta$ -lap induced SIRT1 repression is NQO1-dependent.** **A.** SIRT1 mRNA levels. **B.** SIRT1 and Ac-FOXO1 protein levels. Data are shown as mean  $\pm$  SEM of three independent experiments, \* $P < 0.05$ , \*\* $P < 0.01$  VS control; # $P < 0.05$ , DIC pretreatment VS corresponding control, Student's *t* test.

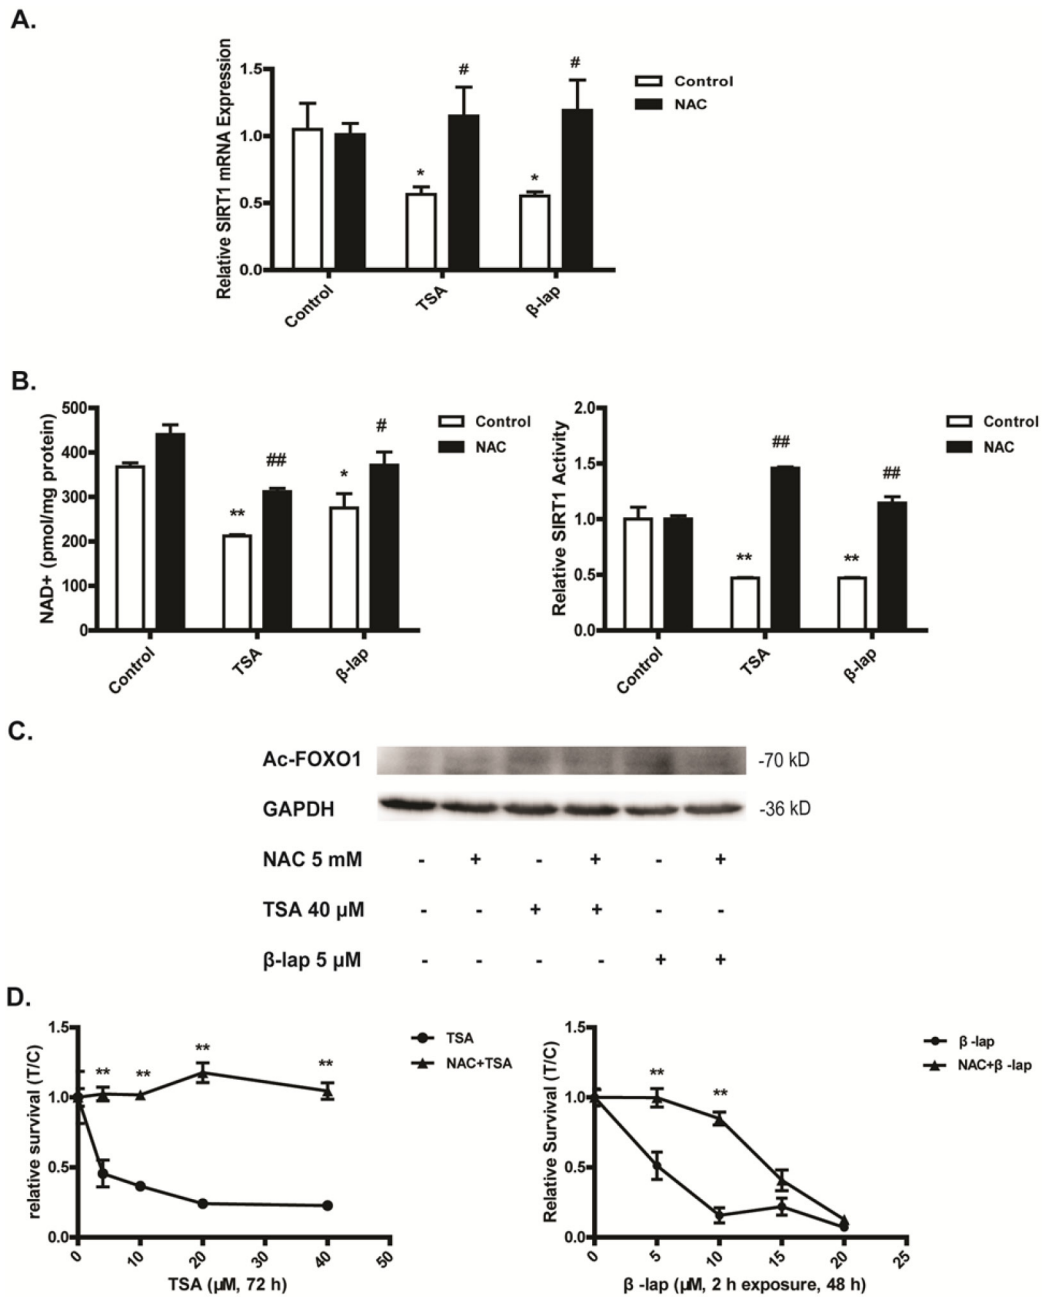

**Supplementary Figure S6: NAC combats against the effects of NQO1 activation.** **A.** SIRT1 mRNA levels. **B.** NAD<sup>+</sup> levels and SIRT1 activity. **C.** PARP-1 and Ac-FOXO1 protein expression. **D.** Cytotoxicity. Data are shown as mean  $\pm$  SEM of three independent experiments, \*P<0.05, \*\* P<0.01 VS control; #P<0.05, ##P<0.01, NAC pretreatment VS corresponding control, Student's *t* test.

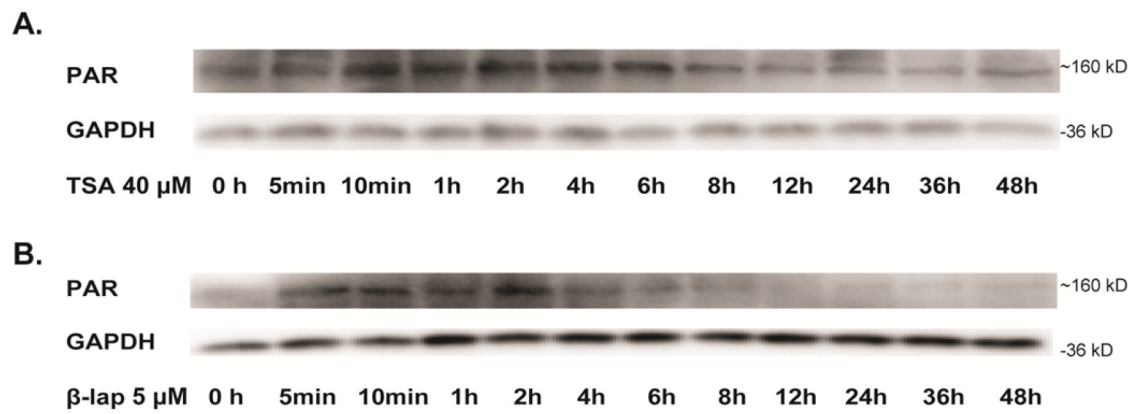

**Supplementary Figure S7: NQO1 substrates induce PARP-1 activation.** PAR polymer formation after TSA **A.** or  $\beta$ -lap **B.** Data are shown as mean  $\pm$  SEM of three independent experiments, \* $P < 0.05$ , \*\*  $P < 0.01$  VS control, Student's *t* test.

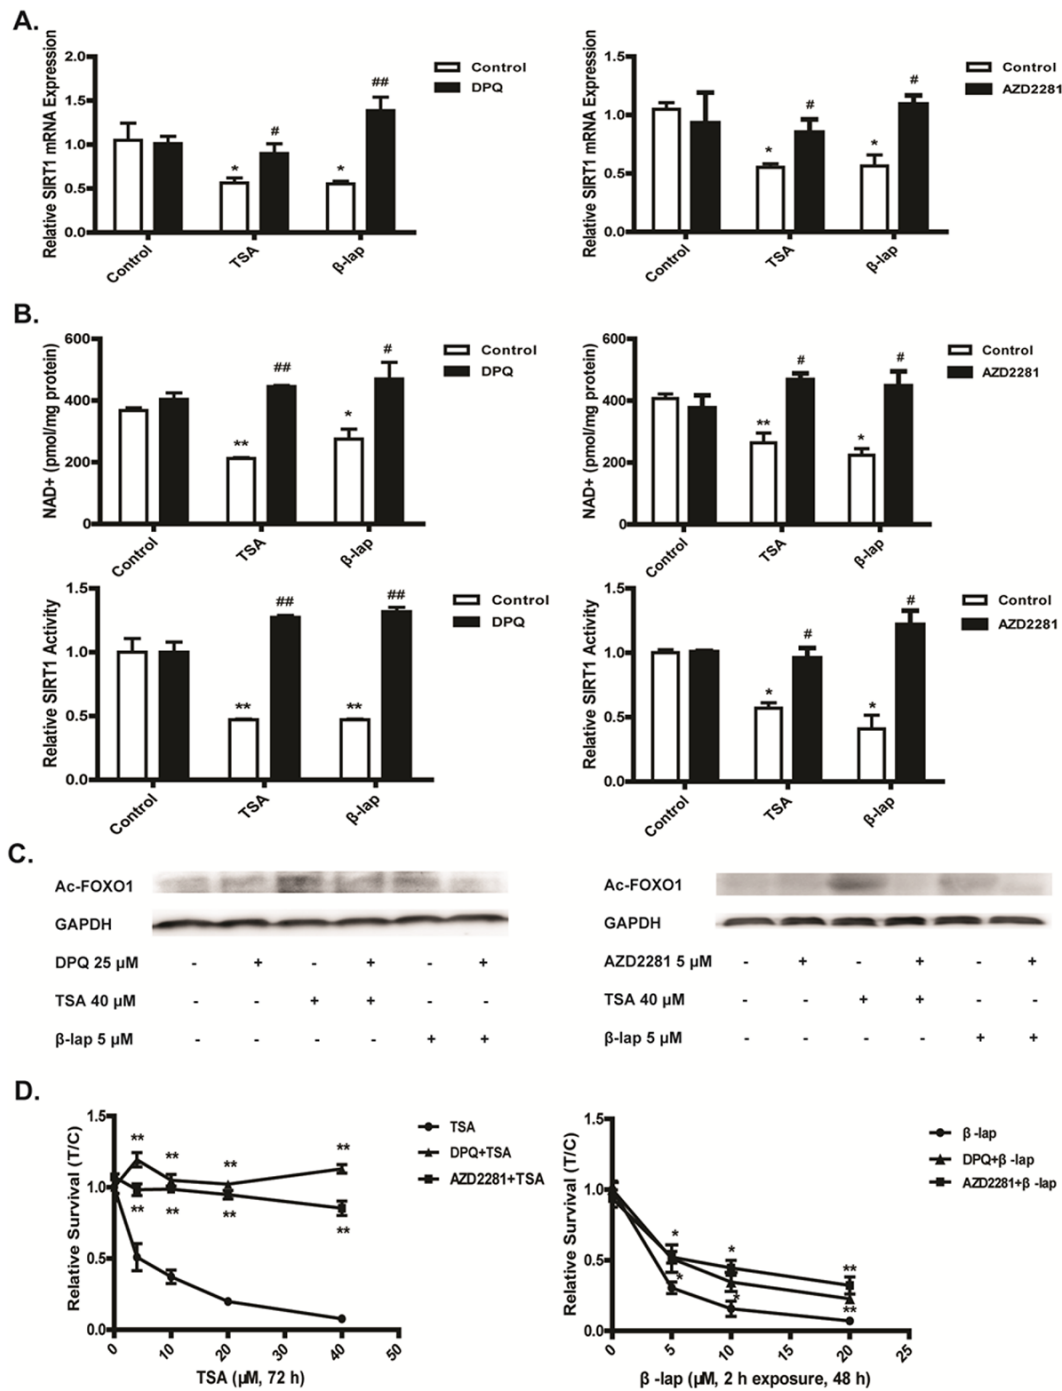

**Supplementary Figure S8: PARP-1 inhibitor DPQ reverses TSA or β-lap induced cell death. A.** SIRT1 mRNA. **B.** NAD<sup>+</sup> levels and SIRT1 activity. **C.** Ac-FOXO1 accumulation. **D.** Cytotoxicity. Data are shown as mean ± SEM of three independent experiments, \*P<0.05, \*\* P<0.01 VS control; #P<0.05, ##P<0.01, DPQ pretreatment VS corresponding control group, Student's *t* test.



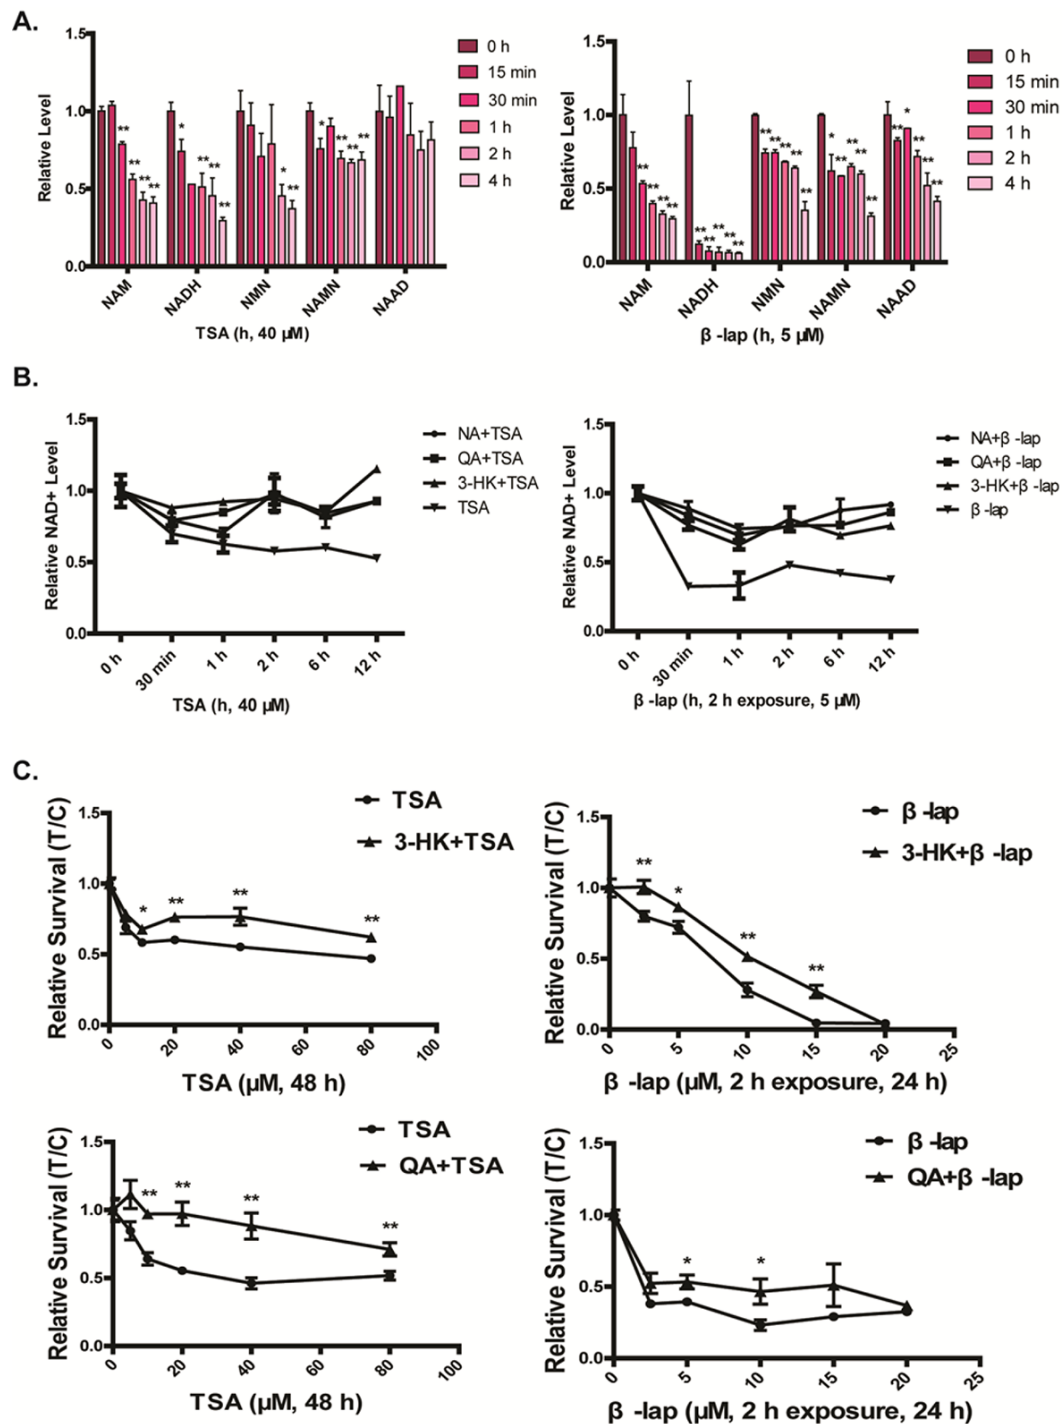

**Supplementary Figure S9: De-novo NAD<sup>+</sup> synthesis regulates NQO1 activation induced cytotoxicity.** A. Levels of the major intermediates involved in NAD<sup>+</sup> synthesis detected by LC-MS<sup>n</sup>. B. NAD<sup>+</sup> levels. C. Cytotoxicity. Data are shown as mean  $\pm$  SEM of three independent experiments, \* $P$ <0.05, \*\* $P$ <0.01 VS control, Student's  $t$  test.

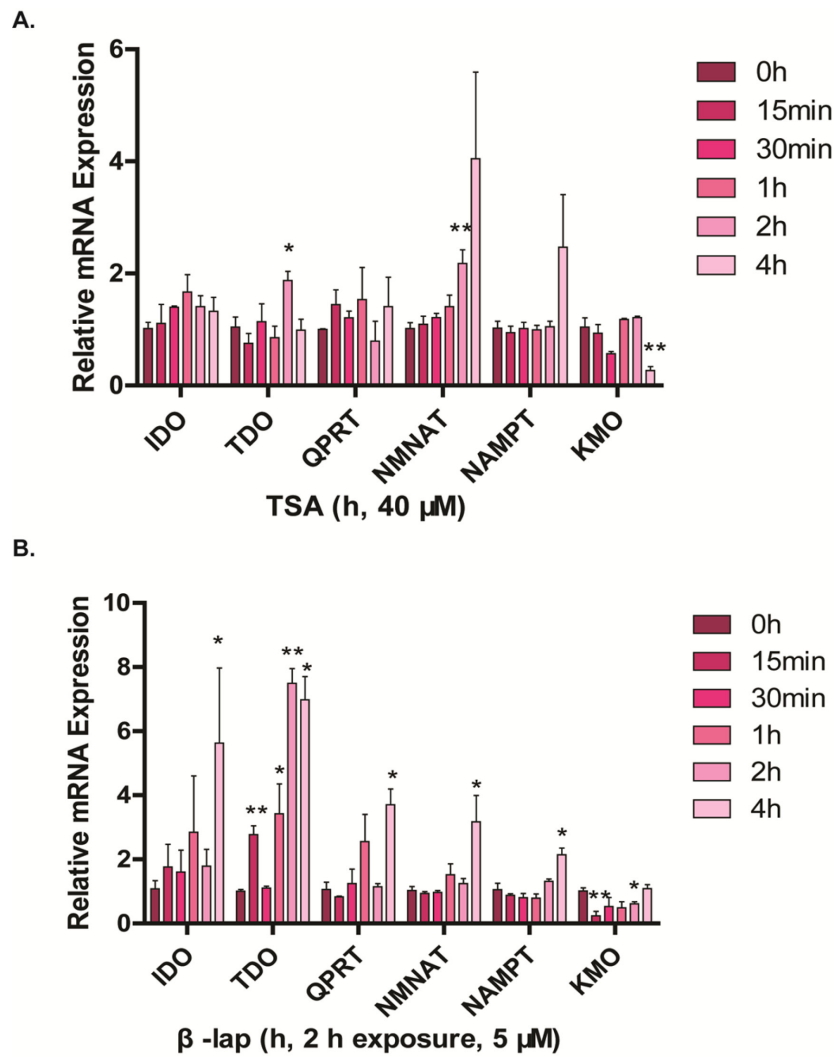

**Supplementary Figure S10: NQO1 substrates compensatively up-regulate NAD<sup>+</sup> synthetic enzymes.** **A.** NAD<sup>+</sup> synthetic enzymes mRNA levels after TSA exposure. **B.** NAD<sup>+</sup> synthetic enzymes mRNA levels after β-lap. Data are shown as mean ± SEM of three independent experiments, \*P<0.05, \*\* P<0.01 VS control, Student's *t* test.

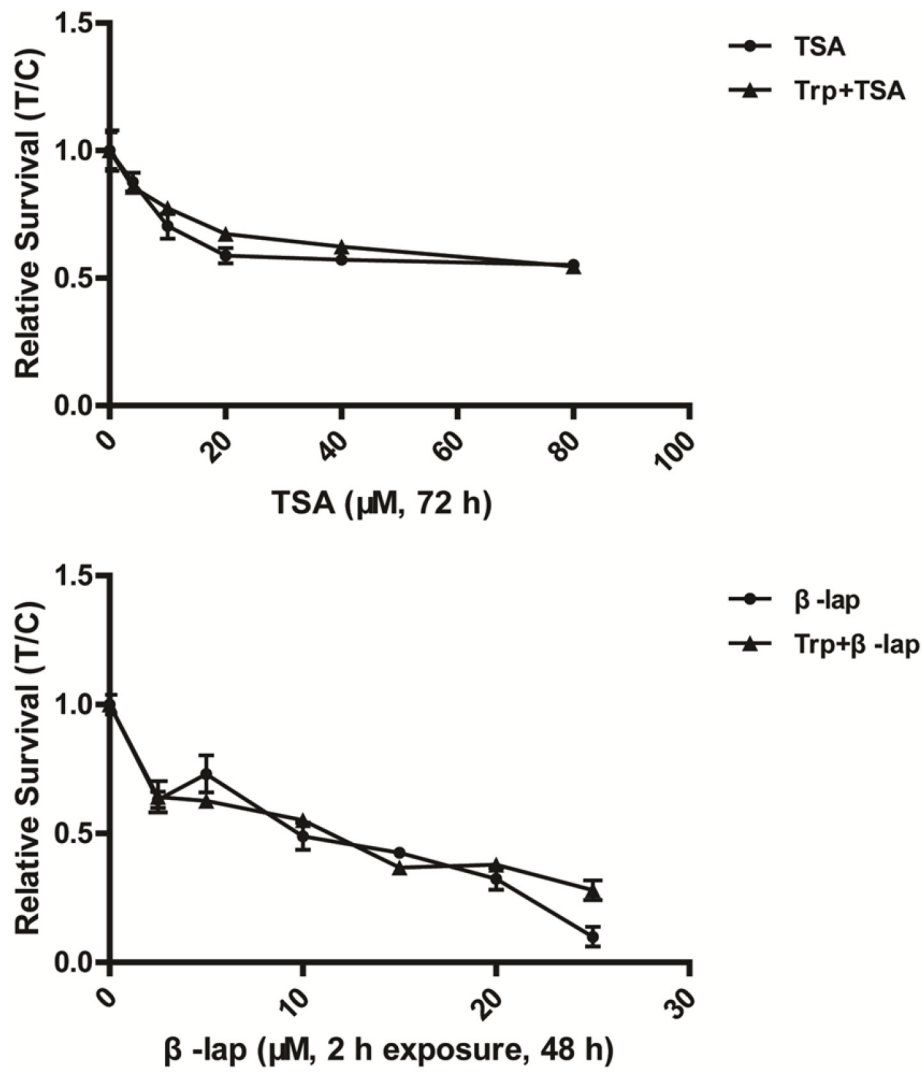

**Supplementary Figure S11: Tryptophan affects little on NQO1 substrates cytotoxicity.** NQO1 substrates cytotoxicity with or without tryptophan pretreatment.

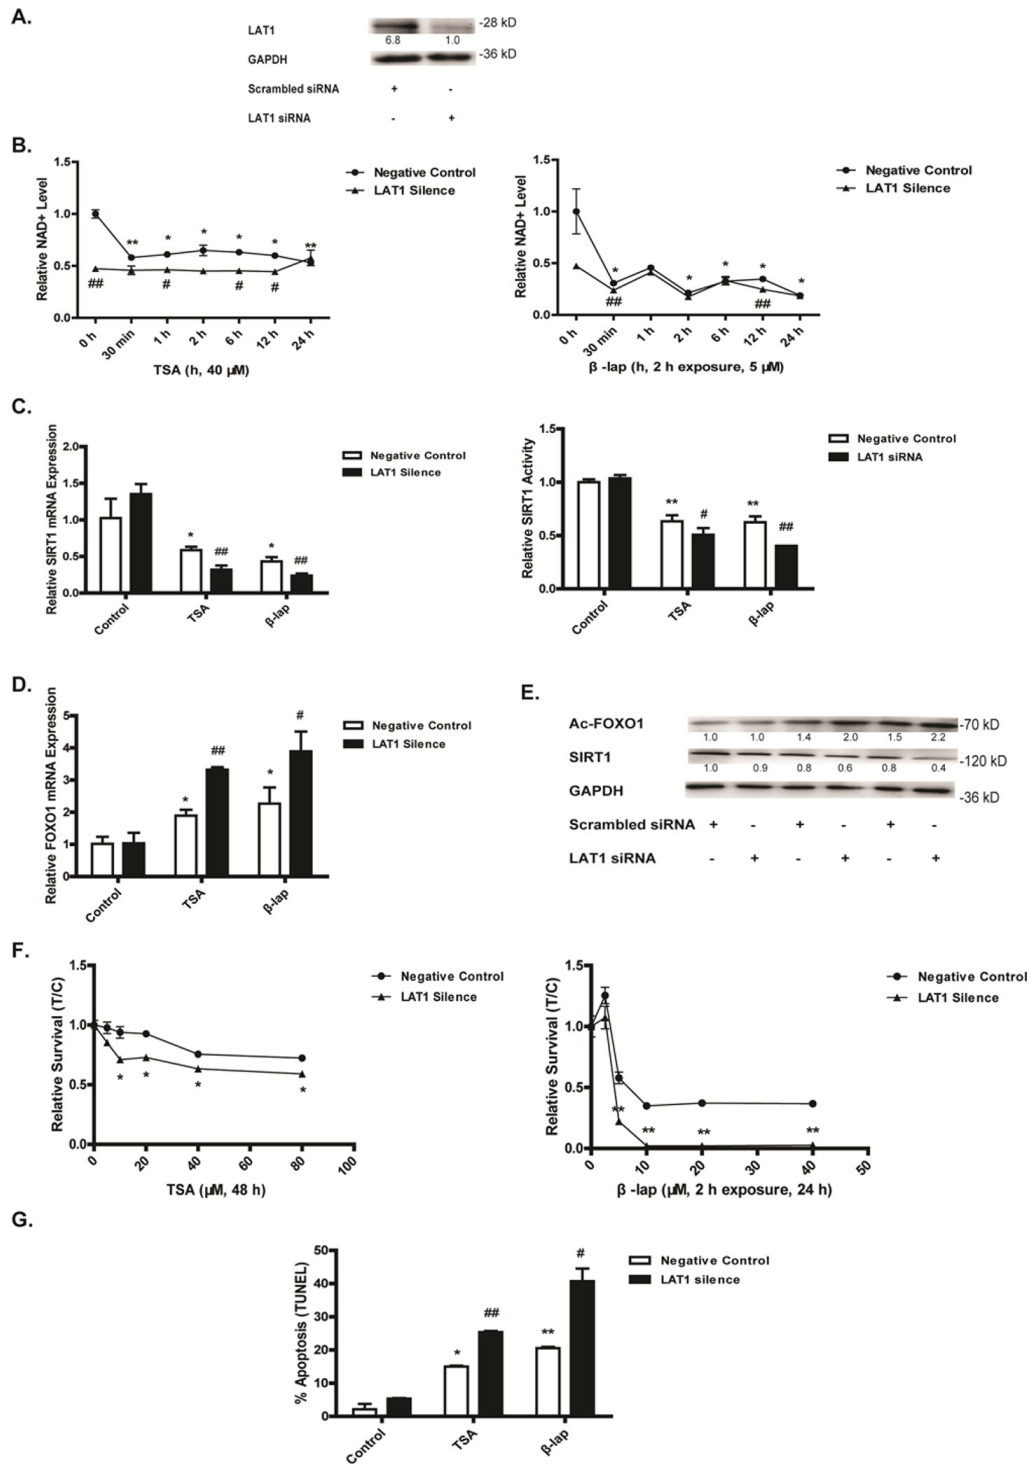

**Supplementary Figure S12: LAT1 silencing increases NQO1 activation induced cell death.** Cells were pretreated with LAT1 siRNA for 24 h and the efficacy was evaluated by western blot **A**. The NAD<sup>+</sup> level **B**. Cells were then treated with TSA (40 μM, 24 h) or β-lap (5 μM, 2 h withdraw, 12 h). The mRNA level and enzyme activity of SIRT1 **C**. The mRNA level of FOXO1 **D**. The protein levels of Ac-FOXO1 and SIRT1 **E**. Cytotoxicity **F**, and apoptosis test **G**, were performed after cells treated with TSA (40 μM, 48 h) or β-lap (5 μM, 2 h withdraw, 24 h). Data are shown as mean ± SEM of three independent experiments (\*P<0.05, \*\*P<0.01, TSA or β-lap treatment compared with control cells; #P<0.05, ##P<0.01, LAT1 siRNA treatment compared with scrambled siRNA treatment).

Supplementary Table S1: siRNA sequences

| siRNA       | siRNA sequences                                         |
|-------------|---------------------------------------------------------|
| FOXO1 siRNA | AGUCUAAGCGCUCAAUGAACAUGCC;<br>GGCAUGUUCAUUGAGCGCUUAGACU |
| NQO1 siRNA  | AAAUGAUGGGAUUGAAGUUCAUGGC;<br>GCCAUGAACUCAAUCCCAUCAU    |
| SIRT1 siRNA | UACAAAUCAGGCAAGAUGCUGUUGC;<br>GCAACAGCAUCUUGCCUGAUUUGUA |
| LAT1 siRNA  | CACAGACUGCCAGGCUCCUACGACA,<br>UGUCGUAGGAGCCUGGCAGUCUGUG |

Supplementary Table S2: Primer sequences for qRT-PCR

| Gene      | Primer sequences                                  |
|-----------|---------------------------------------------------|
| FOXO1     | TCATGTCAACCTATGGCAG;<br>CATGGTGCTTACCGTGTG;       |
| FOXO3     | CATCATGGCAAGCACAGAGT;<br>CAGGTCGTCCATGAGGTTTT;    |
| FOXO4     | CAGCCAGTTCATCAAGGTTTAC;<br>CCACATATCCGCTTCTTCACG; |
| SIRT1     | TCAGTGTTCATGGTTCCTTTGC;<br>AATCTGCTCCTTTGCCACTCT; |
| PARP-1    | GGCACTCTTGGAGACCATGTCA;<br>AAGGCGAATGCCAGCGTTAC   |
| CD38      | GCTAAAACAACCACAGCGACTGG;<br>ACCCCGCCTGGAGCCCTA TG |
| NAMPT     | AAGAGACTGCTGGCATAGGA;<br>ACCACAGATACAGGCACTGA;    |
| QPRT      | CACGTGGCAGGCACGAGGAGG;<br>GAGGGAGAAATCAAGGGCTGG;  |
| IDO       | TCACAGACCACAAGTCACAGC;<br>AGTTGGCAGTAAGGAACAGCA;  |
| TDO       | CTTAGTAAAGGTGAAAGACGG;<br>GTCCATAAGAGAAGTCAGCA;   |
| KMO       | AGAGATGCGAGCACATGTCAA;<br>CCATGGTCTTCTCAAGCGGA    |
| y+LAT1    | GAAGGAGGAGCATCAGACCA;<br>CCCAGTTCCGCATAACAAAG;    |
| ATA2      | AACTACTCCTACCCACCAAG;<br>TAAGGTGGTGTTTATTGTTTC;   |
| homo-ACTB | AAGAGCTACGAGCTGCCTGAC;<br>TCCTGCTTGCTGATCCACAT    |

**Supplementary Table S3: Details of antibodies used in this study**

| <b>Name of Antibody</b>                                       | <b>Manufacturer</b>       | <b>Cat. No.</b> |
|---------------------------------------------------------------|---------------------------|-----------------|
| SIRT1                                                         | Santa Cruz Biotechnology  | sc-15404        |
| FOXO1                                                         | Cell Signaling Technology | 2880            |
| FOXO3                                                         | Cell Signaling Technology | 2497            |
| Ac-FOXO1                                                      | Santa Cruz Biotechnology  | sc-49437        |
| NQO1                                                          | epitomics                 | S2173           |
| LAT1                                                          | Abcam                     | ab32070         |
| PARP-1                                                        | Cell Signaling Technology | 9542            |
| TRAIL                                                         | Cell Signaling Technology | 3219            |
| BIM                                                           | Cell Signaling Technology | 2933            |
| FasL                                                          | BD pharmingen™            | 556374          |
| BCL-6                                                         | Santa Cruz Biotechnology  | sc-858          |
| GAPDH                                                         | Shengxing                 | SAP1646         |
| Anti-rabbit IgG, HRP-linked Antibody                          | Cell Signaling Technology | 7074            |
| Anti-mouse IgG, HRP-linked Antibody                           | Cell Signaling Technology | 7076            |
| Goat anti-Rabbit IgG (H+L) Secondary Antibody, FITC conjugate | Life Technologies         | 65-6111         |
| Anti-rabbit IgG Alexa Fluor® 594 Conjugate                    | Life Technologies         | R37117          |

**Supplementary Table S4: Parameters of NAD<sup>+</sup> and NAD<sup>+</sup> synthetic intermediates in MRM detection with LC-MS**

| Compound                                 | m/z of precursor ion | m/z of product ion | DP | CE |
|------------------------------------------|----------------------|--------------------|----|----|
| NAD <sup>+</sup>                         | 664.3                | 136.3              | 95 | 60 |
| NAAD                                     | 665.2                | 665.2              | 87 | 5  |
| NMN                                      | 335.2                | 123.2              | 47 | 21 |
| NAMN                                     | 336.1                | 124.0              | 51 | 20 |
| NAM                                      | 123.2                | 80.2               | 55 | 28 |
| NADH                                     | 666.3                | 649.2              | 93 | 23 |
| TRP                                      | 205.2                | 90.9               | 44 | 53 |
| <sup>15</sup> N <sub>2</sub> labeled TRP | 207.2                | 91.9               | 44 | 53 |
| <sup>15</sup> N labeled NAD <sup>+</sup> | 665.3                | 136.3              | 95 | 60 |
| <sup>15</sup> N labeled NADH             | 667.3                | 650.2              | 93 | 23 |
| 2-ClAde                                  | 302.2                | 169.9              | 70 | 25 |
